# Supplementary material
Source: HighWire-hosted journal article supplement (https://mct.aacrjournals.org/content/suppl/2019/12/21/1535-7163.MCT-19-0221)
Supplement: 218186_2_supp_5907329_q166kp.pdf [file 218186_2_supp_5907329_q166kp.pdf]

**Table S4.** Overview of EC50 values for *in vitro* cytotoxicity of CH129-ADC compounds

| Cell line      | In vitro cytotoxicity     |           |           |         |         |         |
|----------------|---------------------------|-----------|-----------|---------|---------|---------|
|                | EC <sub>50</sub> (nmol/L) |           |           |         |         |         |
|                | CH129-vcE                 | CH129-DM1 | CH129-DM4 | RTX-vcE | RTX-DM1 | RTX-DM4 |
| <b>COLO205</b> | 0.07                      | 0.2       | 0.1       | N/A     | N/A     | 5       |
| <b>HCT-15</b>  | 12.4                      | 7.0       | 2.8       | 120     | N/A     | 9.0     |
| <b>BxPC3</b>   | 1.4                       | 9.0       | 2.0       | ND      | ND      | ND      |

N/A, curve fitting not converged or ambiguous; ND, not determined
